# Supplementary material for: Metagenomic next-generation sequencing for the clinical identification of spinal infection-associated pathogens
Source: Front Cell Infect Microbiol. 2025 Jan 7;14:1437665. doi: 10.3389/fcimb.2024.1437665 (PMC11753247; doi:10.3389/fcimb.2024.1437665)
Supplement: Supplementary file 1 [file Table1.xlsx]

## Sheet: 最终数据 (2)
ID	NAME	Sex	Age, yrs	Date	Results of mNGS	Sequence	Abundance(%)	Results of Culture	ESR(mm/hr)	CRP（mg/L）	PCT(ng/ml)	Histopathological	CT	MRI	Antibiotic use	Infection site	Method of sampling	Operation history	Hypertension	Diabetes
1	张*	Female	64	2020.08.22	Mycobacterium abscessus	5	90.31	Negative	85	38.62	<0.05	inflammation	inflammation	inflammation	cefoperazone/sulbactam	Lumbar spine	Surgical sampling	YES	YES	YES
2	陈*	Female	60	2020.09.03	Streptococcus mitis、Staphylococcus haemolyticus	40、39	26.52、33.15	Negative	107	25.9	<0.05	focal necrosis	infection	infection	amoxicillin/sulbactam	Lumbar spine	needle biopsy	YES	NO	NO
3	吴*	Female	65	2020.09.05	Streptococcus oralis、Streptococcus mitis	3961、40	96.02、88.44	Negative	21	53.15	0.22	inflammation	Negative	inflammation	NO	Lumbar spine	needle biopsy	NO	YES	NO
4	林*	Male	71	2020.11.24	Mycobacterium tuberculosis	208	80.12	Negative	84	83.2	0.3	infection	infection、tuberculosis	infection	NO	Lumbar spine	needle biopsy	NO	YES	NO
5	曾*	Male	55	2021.01.28	Negative	/	/	Negative	15	2.05	<0.05	focal necrosis	tuberculosis	inflammation、infection	NO	Lumbar spine	needle biopsy	NO	NO	NO
6	吴*	Male	50	2021.03.24	Mycobacterium tuberculosis	1	18.22	Negative	98	53	<0.05	inflammation	inflammation	abscess	cefoperazone/sulbactam + levofloxacin	Lumbar spine	Surgical sampling	YES	NO	YES
7	林*	Male	75	2021.04.30	Moraxella osloensis	301	92.01	Negative	40	9.66	<0.05	inflammation	Negative	inflammation、infection	NO	Lumbar spine	needle biopsy	YES	NO	NO
8	丁*	Female	10	2021.05.16	Escherichia coli	162	48	Negative	74	7.23	<0.05	inflammation	infection、tuberculosis	infection、tuberculosis	NO	Lumbar spine	needle biopsy	NO	NO	NO
9	方*	Female	72	2021.05.30	Streptococcus anginosus	233	80.01	Negative	82	8.01	<0.05	infection	inflammation、infection	infection	cefoperazone/sulbactam	Lumbar spine	Surgical sampling	YES	NO	NO
10	翁*	Male	64	2021.06.19	Cutibacterium acnes	123	63.62	Corynebacterium striatum	46	29.3	<0.05	inflammation	inflammation	infection	NO	Lumbar spine	Surgical sampling	YES	NO	NO
11	叶*	Female	70	2021.06.27	Negative	/	/	Negative	99	16.16	<0.05	inflammation	inflammation	inflammation	levofloxacin	Lumbar spine	needle biopsy	YES	YES	YES
12	薛*	Male	59	2021.10.10	Staphylococcus epidermidis	562	97.78	Negative	103	74.04	0.13	inflammation	inflammation、tuberculosis	inflammation、tuberculosis	NO	Lumbar spine	needle biopsy	YES	YES	NO
13	陈*	Female	67	2021.10.27	Negative	/	/	Negative	98	28.1	<0.05	inflammation	Negative	infection	NO	Lumbar spine	needle biopsy	YES	NO	NO
14	李*	Female	80	2021.11.03	Mycobacterium tuberculosis	1	2.01	Negative	29	8.35	<0.05	inflammation	infection	infection	NO	Lumbar spine	needle biopsy	YES	NO	NO
15	吴*	Female	65	2021.11.08	Negative	/	/	Negative	70	20	0.14	inflammation	Negative	Negative	cefoperazone/sulbactam	Lumbar spine	Surgical sampling	YES	YES	YES
16	徐*	Female	61	2021.11.10	Mycobacterium tuberculosis	6	11.13	Negative	58	11.59	<0.05	inflammation	inflammation、tuberculosis	inflammation、tuberculosis	NO	Lumbar spine	needle biopsy	YES	YES	NO
17	付*	Female	62	2021.11.16	Negative	/	/	Negative	100	2.02	<0.05	inflammation	infection	Negative	NO	Lumbar spine	needle biopsy	NO	NO	NO
18	赵*	Female	63	2021.12.14	Mycobacterium tuberculosis	1	6.21	Negative	62	110.16	<0.05	focal necrosis	Negative	inflammation	NO	Lumbar spine	needle biopsy	YES	YES	NO
19	游*	Male	58	2021.12.24	Staphylococcus epidermidis	11911	90.45	Negative	59	9.34	<0.05	infection	infection	infection	NO	Thoracic spine	needle biopsy	YES	YES	NO
20	杨*	Female	63	2022.01.05	Staphylococcus aureus	16442	94.86	Negative	124	200.6	1.69	inflammation	Negative	Negative	cefoperazone/sulbactam	Lumbar spine	Surgical sampling	NO	YES	NO
21	林*	Female	44	2022.02.19	Staphylococcus aureus	350	27	Negative	49	19.13	<0.05	inflammation	inflammation、tuberculosis	inflammation、tuberculosis	NO	Lumbar spine	needle biopsy	NO	NO	NO
22	张*	Male	53	2022.03.03	Staphylococcus aureus	2359	95.01	Negative	80	30.16	<0.05	inflammation	Negative	inflammation	vancomycin	Lumbar spine	Surgical sampling	YES	NO	NO
23	陈*	Male	68	2022.03.09	Negative	/	/	Negative	79	61.37	<0.05	inflammation	Negative	inflammation	NO	Lumbar spine	needle biopsy	YES	NO	NO
24	张*	Female	59	2022.03.10	Staphylococcus aureus	216	92.31	Negative	82	27.39	<0.05	inflammation	inflammation、tuberculosis	inflammation、tuberculosis	vancomycin	Lumbar spine	Surgical sampling	YES	YES	YES
25	李*	Female	72	2022.03.11	Staphylococcus aureus	6672	99.55	Negative	97	53.43	0.11	inflammation	Negative	inflammation、infection	NO	Lumbar spine	needle biopsy	YES	YES	YES
26	邹*	Male	51	2022.03.18	Mycobacterium tuberculosis	186	58.21	Negative	47	48	0.09	inflammation	abscess、tuberculosis	abscess、tuberculosis	cefazolin	Thoracic spine	Surgical sampling	NO	YES	NO
27	陆*	Male	49	2022.03.31	Escherichia coli	58971	99.52	Negative	79	99.68	0.36	inflammation	inflammation、tuberculosis	infection、tuberculosis	ceftazidime	Lumbar spine	needle biopsy	NO	NO	NO
28	董*	Female	82	2022.04.15	Staphylococcus aureus	862	98.88	Negative	67	66.68	0.12	inflammation	Negative	infection	vancomycin	Lumbar spine	Surgical sampling	YES	NO	NO
29	卢*	Male	62	2022.04.24	Parvimonas micra	61	83.56	Negative	29	18.06	<0.05	inflammation	inflammation	infection	vancomycin	Lumbar spine	Surgical sampling	YES	NO	NO
30	陈*	Female	66	2022.04.27	Proteus mirabilis	57	89.06	Negative	112	90.6	0.07	inflammation	inflammation	inflammation	NO	Thoracic spine	needle biopsy	YES	NO	NO
31	陈*	Male	69	2022.05.11	Staphylococcus aureus	4231	98.26	Negative	60	179.2	0.28	inflammation	Negative	abscess	NO	Lumbar spine	needle biopsy	NO	YES	NO
32	李*	Female	70	2022.06.18	Escherichia coli	162	72.02	Negative	90	60.7	3.93	inflammation	infection	inflammation	NO	Lumbar spine	needle biopsy	YES	NO	NO
33	刘*	Male	54	2022.06.20	Negative	/	/	Negative	104	37.3	<0.05	inflammation	Negative	infection	vancomycin	Lumbar spine	Surgical sampling	YES	NO	NO
34	陈*	Male	73	2022.07.05	Staphylococcus aureus	681	87.19	Negative	91	148	0.76	inflammation	infection	infection	NO	Lumbar spine	needle biopsy	NO	NO	NO
35	郭*	Male	71	2022.09.15	Prevotella bivia	35117	99.08	Negative	87	80.08	0.412	infection	Negative	inflammation	NO	Lumbar spine	needle biopsy	YES	NO	NO
36	王*	Female	47	2022.12.01	Staphylococcus aureus	9398	99.8	Negative	101	154.41	0.112	inflammation	Negative	Negative	NO	Thoracic spine	needle biopsy	NO	NO	NO
37	徐*	Female	81	2022.12.14	Negative	/	/	Negative	61	16.48	0.052	inflammation	Negative	Negative	NO	Lumbar spine	needle biopsy	YES	NO	NO
38	孙*	Female	71	2022.12.21	Staphylococcus aureus	2563	99.72	Negative	112	228.63	1.017	inflammation	inflammation	inflammation	vancomycin	Lumbar spine	Surgical sampling	YES	NO	NO
39	李*	Female	56	2023.02.03	Staphylococcus aureus	359	69.77	Negative	27	13.21	<0.05	inflammation	infection	inflammation	vancomycin	Lumbar spine	needle biopsy	YES	YES	YES
40	张*	Male	64	2023.03.01	Staphylococcus epidermidis	145	80.66	Negative	45	43.73	0.105	inflammation	Negative	hydrops	vancomycin	Lumbar spine	Surgical sampling	YES	YES	NO
41	王*	Female	85	2023.03.30	Negative	/	/	Negative	42	28.83	<0.05	inflammation	infection	infection	vancomycin	Lumbar spine	Surgical sampling	NO	YES	NO
42	杨*	Male	68	2023.04.07	Coxiella burnetii	1280	96.57	Negative	45	54.51	<0.05	inflammation	inflammation	inflammation	vancomycin	Lumbar spine	Surgical sampling	YES	YES	YES
43	吴*	Female	59	2023.04.13	Mycobacterium avium	125	5.91	Negative	19	3.58	<0.05	inflammation	infection	infection	vancomycin	Thoracic spine	Surgical sampling	YES	NO	NO
44	李*	Male	58	2023.04.20	Brucella melitensis	1651	99.16	Negative	94	33.72	0.185	inflammation	Negative	infection、tuberculosis	NO	Lumbar spine	needle biopsy	NO	NO	NO
45	郭*	Female	71	2023.05.10	Negative	/	/	Negative	83	111.14	0.894	inflammation	infection	infection、abscess	vancomycin	Lumbar spine	Surgical sampling	YES	NO	NO
46	刘*	Female	71	2023.05.16	Negative	/	/	Negative	107	70.56	0.516	inflammation	infection	infection	vancomycin	Lumbar spine	Surgical sampling	NO	NO	NO
47	张*	Female	57	2023.05.18	Mycobacterium avium	1263	94.88	Negative	22	33.3	0.102	inflammation	infection、tuberculosis	infection	vancomycin	Thoracic spine	Surgical sampling	YES	YES	NO
48	黄*	Male	68	2023.05.25	Mycobacterium tuberculosis	19	51.35	Negative	19	16.5	<0.05	inflammation	infection、tuberculosis	infection、tuberculosis	vancomycin	Thoracic spine	Surgical sampling	YES	NO	NO
49	叶*	Female	80	2023.06.08	Streptococcus intermadius	214658	99.94	Streptococcus intermadius	66	171.96	1.373	inflammation	infection	infection	vancomycin	Lumbar spine	Surgical sampling	YES	NO	NO
50	郑*	Male	82	2023.06.22	Staphylococcus epidermidis	348	92.77	Negative	43	12.2	0.063	inflammation	infection	infection	vancomycin	Lumbar spine	Surgical sampling	YES	NO	NO
51	叶*	Female	46	2023.07.11	Streptococcus pyogenes	1733	90.8	Negative	129	126.51	1.8	inflammation	abscess	infection	vancomycin + cefoperazone/sulbactam	Lumbar spine	Surgical sampling	NO	NO	NO
52	陈*	Male	90	2023.07.18	Streptococcus gordonii、Streptococcus sanguinis	7325、172	98.15、98.15	Streptococcus gordonii	94	125.77	0.351	necrosis	Negative	infection	NO	Lumbar spine	needle biopsy	YES	YES	NO
53	陈*	Male	82	2023.07.19	Negative	/	/	Moraxella osloensis	74	30.35	0.093	inflammation	infection	infection	NO	Lumbar spine	Surgical sampling	NO	NO	NO
54	陈*	Female	72	2023.08.03	Negative	/	/	Negative	18	8.97	0.055	inflammation	infection	infection	cefoperazone/sulbactam	Lumbar spine	Surgical sampling	NO	NO	NO
55	曾*	Male	50	2023.08.17	Haemophilus hemolyticus、Haemophilus influenzae	979、140	96.57、96.57	Negative	56	37.24	0.095	inflammation	infection	infection	ceftriaxone + vancomycin	Lumbar spine	Surgical sampling	NO	YES	NO
56	林*	Female	82	2023.08.24	Staphylococcus aureus	3349	99.02	Negative	74	78.43	0.09	infection	Negative	infection、abscess	vancomycin	Lumbar spine	Surgical sampling	NO	NO	NO
57	李*	Male	65	2023.09.04	Negative	/	/	Negative	75	95.74	<0.05	inflammation	infection	inflammation	vancomycin	Lumbar spine	Surgical sampling	YES	NO	NO
58	徐*	Male	64	2023.09.08	Brucella melitensis	61	63.54	Negative	43	10.08	<0.05	inflammation	infection	infection、tuberculosis	gentamycin	Lumbar spine	Surgical sampling	NO	NO	NO
59	杨*	Female	66	2023.09.13	Streptococcus constellatus	3508	98.73	Negative	27	47.54	0.096	inflammation	Negative	inflammation	vancomycin	Lumbar spine	Surgical sampling	YES	NO	NO
60	张*	Female	57	2023.09.15	Negative	/	/	Negative	45	13.21	<0.05	inflammation	inflammation	inflammation	NO	Lumbar spine	needle biopsy	NO	NO	NO
61	郑*	Male	65	2023.09.25	Salmonella enterica	2563	98.45	Negative	66	71.07	0.077	inflammation	infection	infection	NO	Lumbar spine	Surgical sampling	NO	NO	YES
62	罗*	Female	57	2023.09.27	Gardnerella vaginosis	269	83.01	Negative	55	28.1	<0.05	inflammation	Negative	Negative	vancomycin	Lumbar spine	Surgical sampling	NO	NO	NO
63	郭*	Male	28	2023.10.06	Negative	/	/	Negative	40	21.3	<0.05	inflammation	abscess、tuberculosis	abscess、tuberculosis	NO	Lumbar spine	Surgical sampling	NO	NO	NO
64	王*	Female	66	2023.10.11	Escherichia coli	149535	58.79	Escherichia coli	66	28.78	0.26	inflammation	Negative	Negative	vancomycin	Lumbar spine	Surgical sampling	YES	NO	NO
65	马*	Male	21	2023.10.13	Mycobacterium tuberculosis	120649	82.43	Negative	78	77.72	0.139	inflammation	inflammation、abscess	abscess、tuberculosis	NO	Lumbar spine	Surgical sampling	NO	YES	YES
66	陈*	Male	48	2023.10.18	Mycobacterium tuberculosis	53309	82.77	Negative	75	19.04	0.078	inflammation	abscess、tuberculosis	abscess、tuberculosis	vancomycin	Lumbar spine	Surgical sampling	NO	NO	NO
67	黄*	Female	72	2023.11.13	Staphylococcus epidermidis	197	96.09	Negative	41	23.54	<0.05	inflammation	infection	infection	vancomycin	Lumbar spine	Surgical sampling	YES	NO	YES
68	郭*	Female	69	2023.11.15	Pseudomonas aeruginosa	199	53.87	Negative	112	50.64	0.143	inflammation	inflammation	inflammation	levofloxacin	Lumbar spine	Surgical sampling	NO	NO	NO
69	林*	Male	39	2023.11.27	Streptococcus gordonii	3070	46.51	Negative	49	28.7	0.259	inflammation	Negative	inflammation	vancomycin	Lumbar spine	Surgical sampling	NO	NO	NO
70	罗*	Female	70	2023.11.29	Mycobacterium tuberculosis	39	82.96	Negative	45	44.1	0.52	inflammation	inflammation	infection	cefoperazone/sulbactam	Lumbar spine	Surgical sampling	NO	NO	NO
71	胡*	Male	79	2023.12.05	Streptococcus oralis、Streptococcus infantarius	28227、25883	25.59、23.47	Streptococcus oralis	102	36.73	0.159	inflammation	infection	infection	vancomycin	Lumbar spine	Surgical sampling	NO	YES	NO
72	章*	Male	72	2023.12.06	Staphylococcus aureus	6196	99.6	Staphylococcus aureus	102	166.02	2.032	inflammation	infection	infection	vancomycin	Lumbar spine	Surgical sampling	NO	NO	NO
73	杨*	Male	58	2023.12.13	Negative	/	/	Negative	5	1.47	<0.05	inflammation	infection	infection	vancomycin	Lumbar spine	Surgical sampling	YES	YES	NO
74	余*	Male	57	2023.12.13	Brucella melitensis	3107	99.62	Negative	94	20.05	0.154	inflammation	infection	infection	NO	Lumbar spine	Surgical sampling	NO	YES	YES
75	张*	Male	37	2023.12.18	Mycobacterium tuberculosis	125	82.78	Negative	56	33.39	0.073	inflammation	abscess	abscess	vancomycin	Lumbar spine	Surgical sampling	NO	NO	NO
76	陈*	Male	64	2023.12.25	Candida glabrata	2912	99.18	Candida glabrata	93	32.98	0.06	inflammation	Negative	inflammation	vancomycin	Lumbar spine	Surgical sampling	NO	NO	YES
77	王*	Male	57	2023.12.27	Staphylococcus aureus	911609	90.92	Staphylococcus aureus	98	82.92	0.061	inflammation	infection	infection	vancomycin	Lumbar spine	Surgical sampling	YES	NO	NO
78	林*	Male	69	2024.01.03	Coxiella burnetii	11	8.2	Negative	9	0.73	<0.05	inflammation	Negative	inflammation	NO	Lumbar spine	needle biopsy	YES	YES	NO
79	刘*	Female	77	2024.01.03	Finegoldia magna	601	15.47	Negative	47	43.8	0.172	inflammation	inflammation	inflammation	vancomycin	Thoracic spine	Surgical sampling	YES	NO	NO
80	张*	Male	53	2024.01.05	Brucella melitensis	3076	86.3	Brucella melitensis	13	9.58	<0.05	inflammation	tuberculosis	tuberculosis	levofloxacin	Cervical spine	Surgical sampling	NO	NO	YES
81	黄*	Male	65	2024.01.09	Mycobacterium tuberculosis	65464	93.99	Negative	80	37.33	<0.05	inflammation	infection、tuberculosis	abscess、tuberculosis	levofloxacin	Lumbar spine	Surgical sampling	YES	NO	NO
82	陈*	Male	57	2024.01.18	Mycobacterium tuberculosis	2	18.75	Negative	77	22.76	0.124	inflammation	abscess、tuberculosis	abscess、tuberculosis	vancomycin + Linezolid	Lumbar spine	Surgical sampling	YES	NO	YES
83	蒲*	Male	72	2024.01.24	Staphylococcus caprae	302	86.04	Negative	42	41.2	0.331	inflammation	infection	Negative	NO	Lumbar spine	Surgical sampling	NO	YES	NO
84	陈*	Female	70	2024.01.29	Mycobacterium tuberculosis	235024	88.68	Negative	50	35.4	0.055	inflammation	infection、tuberculosis	infection、tuberculosis	levofloxacin	Thoracic spine	Surgical sampling	NO	NO	NO
85	张*	Male	73	2024.01.29	Staphylococcus aureus	104	84.8	Negative	42	41.2	0.331	inflammation	infection	infection	vancomycin	Lumbar spine	Surgical sampling	YES	NO	NO
86	刘*	Female	89	2024.01.31	Mycobacterium tuberculosis	691	92.02	Negative	16	73.3	0.069	inflammation	tuberculosis	tuberculosis	NO	Lumbar spine	Surgical sampling	YES	YES	YES
87	罗*	Female	33	2024.01.31	Mycobacterium tuberculosis	1	52	Negative	20	2.32	<0.05	inflammation	inflammation	inflammation	NO	Lumbar spine	needle biopsy	YES	NO	NO
88	魏*	Male	76	2024.02.05	Negative	/	/	Negative	107	34.05	<0.05	inflammation	infection	infection	vancomycin + levofloxacin	Lumbar spine	Surgical sampling	NO	NO	NO
89	黄*	Female	66	2024.02.05	Staphylococcus epidermidis、Staphylococcus caprae	725 、111	37.32、48.56	Staphylococcus warneri	43	11.7	0.094	infection	inflammation	Negative	NO	Lumbar spine	needle biopsy	YES	NO	NO
90	郑*	Male	80	2024.02.05	Enterococcus faecalis	2230	99.29	Negative	78	28.22	<0.05	inflammation	inflammation	inflammation	NO	Lumbar spine	needle biopsy	NO	NO	NO
91	张*	Male	57	2024.02.05	Brucella melitensis	253	56.32	Negative	42	28.81	0.068	inflammation	infection	infection、abscess	NO	Lumbar spine	Surgical sampling	NO	YES	NO
92	陈*	Male	63	2024.02.27	Coxiella burnetii	242	60.24	Negative	122	233.52	0.323	inflammation	inflammation	infection	cefoperazone/sulbactam + vancomycin	Lumbar spine	Surgical sampling	NO	NO	NO
93	江*	Female	72	2024.02.27	Staphylococcus aureus	588	97.53	Staphylococcus aureus	42	28.81	0.068	inflammation	infection	abscess	NO	Lumbar spine	needle biopsy	NO	YES	YES
94	陈*	Male	73	2024.02.28	Escherichia coli	9787	77.6	Eikenella corrodens	61	8.21	<0.05	inflammation	Negative	inflammation	vancomycin	Lumbar spine	Surgical sampling	NO	NO	NO
95	陈*	Male	83	2024.02.29	Pseudomonas aeruginosa	99051	48.6	Negative	27	98.48	0.401	inflammation	infection	infection	vancomycin	Lumbar spine	Surgical sampling	NO	NO	NO
96	陈*	Male	69	2024.03.13	Staphylococcus aureus	2172433	85.62	Staphylococcus aureus	116	141.98	0.576	inflammation	infection、tuberculosis	abscess、tuberculosis	vancomycin	Lumbar spine	Surgical sampling	NO	YES	NO
97	吴*	Male	35	2024.03.13	Brucella melitensis	238450	99.94	Brucella melitensis	61	33.59	<0.05	inflammation	infection	infection	vancomycin	Lumbar spine	Surgical sampling	NO	NO	NO
98	蔡*	Male	75	2024.03.14	Klebsiella pneumoniae	82850	85.61	Klebsiella pneumoniae	16	126.36	0.826	inflammation	Negative	Negative	vancomycin	Lumbar spine	Surgical sampling	YES	NO	NO
99	林*	Female	73	2024.03.14	Mycobacterium tuberculosis	282	89.22	Negative	88	61.32	0.055	necrosis	inflammation	inflammation	vancomycin	Lumbar spine	Surgical sampling	YES	NO	NO
100	陈*	Male	76	2024.03.15	Cutibacterium modestum	344061	93.53	Staphylococcus epidermidis	35	12.69	<0.05	inflammation	Negative	infection	vancomycin	Lumbar spine	Surgical sampling	YES	NO	NO
101	吴*	Female	89	2024.03.25	Staphylococcus aureus	70	49.63	Staphylococcus aureus	25	1.4	<0.05	inflammation	Negative	inflammation	vancomycin	Thoracic spine	Surgical sampling	YES	NO	NO
102	江*	Male	62	2024.03.26	Staphylococcus aureus	734	92.39	Negative	123	49.36	0.23	inflammation	inflammation	infection	cefazolin	Lumbar spine	Surgical sampling	NO	NO	NO
103	黄*	Male	66	2024.03.26	Parvimonas micra	24549	30.67	Negative	79	15	<0.05	inflammation	Negative	Negative	NO	Lumbar spine	Surgical sampling	YES	YES	YES
104	林*	Male	60	2024.04.02	Staphylococcus aureus、klebsiella pneumoniae	121、55	47.09、23.17	Negative	70	28.5	0.212	inflammation	infection	infection	NO	Lumbar spine	Surgical sampling	YES	NO	NO
105	林*	Male	72	2024.04.08	Coxiella burnetii	2	1.63	Negative	15	6.89	0.066	inflammation	inflammation	inflammation	NO	Lumbar spine	Surgical sampling	NO	YES	YES
106	黄*	Male	67	2024.04.10	Staphylococcus aureus	99	83.19	Negative	104	126.9	0.168	inflammation	inflammation	inflammation	cefazolin	Lumbar spine	Surgical sampling	YES	NO	NO
107	王*	Female	75	2024.04.11	Escherichia coli	1817	35.32	Escherichia coli	122	60.5	0.081	infection	Negative	Negative	vancomycin	Thoracic spine	Surgical sampling	NO	YES	NO
108	程*	Male	91	2024.04.17	Mycobacterium tuberculosis	31	26.72	Negative	77	6.92	0.133	infection	infection	Negative	vancomycin	Lumbar spine	Surgical sampling	YES	YES	YES
109	张*	Male	34	2024.04.18	Mycobacterium tuberculosis	901	99.12	Negative	31	51.1	0.403	infection	Negative	infection	NO	Lumbar spine	Surgical sampling	YES	YES	NO
110	陈*	Male	64	2024.04.18	Staphylococcus aureus	28815	96.52	Staphylococcus aureus	56	46.6	0.29	infection	inflammation	inflammation	vancomycin + Linezolid	Lumbar spine	Surgical sampling	NO	YES	NO
111	陈*	Male	49	2024.04.18	Brucella melitensis	102	82.24	Brucella melitensis	37	2.49	<0.05	infection	Negative	Negative	vancomycin	Lumbar spine	Surgical sampling	YES	NO	NO
112	卞*	Female	82	2024.04.22	Staphylococcus aureus	1566	99.49	Staphylococcus aureus	8	0.4	<0.05	infection	inflammation	inflammation	vancomycin	Lumbar spine	Surgical sampling	YES	NO	NO
113	陈*	Male	72	2024.04.24	Candida albicans、Mycobacterium tuberculosis	38、1	95.23、3.71	Candida albicans	7	0.67	<0.05	infection	inflammation	inflammation	NO	Lumbar spine	needle biopsy	YES	NO	NO
114	林*	Male	69	2024.04.25	Bacteroides fragilis	2119	18.85	Bacteroides fragilis	16	1.29	<0.05	infection	inflammation	inflammation	vancomycin	Lumbar spine	Surgical sampling	NO	NO	NO
115	季*	Female	71	2024.04.25	Mycobacterium tuberculosis	38	55.07	Negative	39	15.8	0.057	necrosis	Negative	Negative	vancomycin	Lumbar spine	Surgical sampling	YES	YES	YES
116	罗*	Male	65	2024.04.28	Negative	/	/	Staphylococcus epidermidis	55	26.1	0.051	inflammation	inflammation	inflammation	vancomycin	Thoracic spine	Surgical sampling	YES	YES	NO
117	林*	Male	64	2024.05.07	Enterobacter cloacae	4689	98.63	Enterobacter cloacae	20	1.4	0.057	inflammation	inflammation	inflammation	vancomycin	Lumbar spine	Surgical sampling	NO	YES	YES
118	王*	Female	75	2024.05.09	Staphylococcus epidermidis	4570	99.46	Staphylococcus epidermidis	94	24.6	0.06	inflammation	inflammation	inflammation	vancomycin	Lumbar spine	Surgical sampling	YES	NO	NO
119	张*	Female	57	2024.05.09	Mycobacterium tuberculosis	44	49.44	Negative	62	9.7	0.061	inflammation	infection	infection	vancomycin + cefoperazone/sulbactam	Lumbar spine	Surgical sampling	NO	YES	NO
120	胡*	Female	66	2024.05.10	Escherichia coli	17878	21.83	Escherichia coli	39	4.99	0.065	inflammation	infection	infection	vancomycin + levofloxacin	Lumbar spine	Surgical sampling	YES	YES	NO
121	王*	Male	51	2024.05.15	Negative	/	/	Negative	87	34.3	0.065	inflammation	inflammation	inflammation	vancomycin	Thoracic spine	Surgical sampling	YES	YES	YES
122	吴*	Male	58	2024.05.15	Listeria monocytogenes	1170	98.42	Listeria monocytogenes	85	12.3	0.066	inflammation	infection、tuberculosis	infection、tuberculosis	vancomycin	Lumbar spine	Surgical sampling	NO	NO	NO
123	曾*	Male	79	2024.05.15	Mycobacterium tuberculosis	44916	88.64	Negative	43	36.2	0.071	inflammation	Negative	inflammation	vancomycin	Thoracic spine	Surgical sampling	NO	NO	NO
124	许*	Female	72	2024.05.22	Negative	/	/	Negative	74	39.9	0.076	inflammation	infection	infection	vancomycin	Lumbar spine	Surgical sampling	NO	YES	NO
125	王*	Female	55	2024.05.22	Negative	/	/	Negative	58	44.07	0.082	inflammation	inflammation	inflammation	vancomycin	Lumbar spine	Surgical sampling	NO	NO	NO
126	陈*	Male	52	2024.05.23	Bacteroides fragilis、Staphylococcus aureus	11360、6643	37.36、21.86	Bacteroides fragilis	85	112.67	0.085	inflammation	infection	infection	vancomycin + cefoperazone/sulbactam	Lumbar spine	Surgical sampling	YES	NO	YES
127	蓝*	Male	68	2024.6.12	Negative	/	/	Staphylococcus epidermidis	48	40.1	0.1	inflammation	Negative	inflammation	vancomycin	Lumbar spine	Surgical sampling	YES	YES	YES
128	王*	Female	58	2024.6.13	Coxiella burnetii	972	76.52	Negative	116	48.03	0.101	inflammation	inflammation	inflammation	vancomycin + levofloxacin	Thoracic spine	Surgical sampling	NO	NO	YES
129	刘*	Female	70	2024.6.26	Mycobacterium tuberculosis	140511	86.23	Negative	82	8.28	0.115	inflammation	inflammation	inflammation	vancomycin	Thoracic spine	Surgical sampling	YES	YES	NO
130	程*	Male	72	2024.6.27	Mycobacterium tuberculosis	63850	84.96	Negative	76	113.9	0.121	inflammation	Negative	infection	vancomycin	Lumbar spine	Surgical sampling	YES	NO	NO
131	罗*	Male	60	2024.6.27	Staphylococcus aureus	3598	98.62	Staphylococcus aureus	108	129.1	0.128	inflammation	inflammation	infection	vancomycin	Lumbar spine	Surgical sampling	YES	YES	YES
132	林*	Female	67	2024.6.27	Achromobacter xylosoxidans	38	42.83	Negative	82	47.13	0.132	inflammation	Negative	Negative	vancomycin	Lumbar spine	Surgical sampling	NO	YES	NO
133	严*	Male	56	2024.6.4	Negative	/	/	Negative	92	42.8	0.086	inflammation	infection	infection、tuberculosis	vancomycin	Thoracic spine	Surgical sampling	NO	NO	NO
134	刘*	Female	72	2024.6.5	Negative	/	/	Staphylococcus aureus	72	94.45	0.095	inflammation	Negative	inflammation	vancomycin	Lumbar spine	Surgical sampling	NO	NO	NO
135	石*	Male	50	2024.6.7	Negative	/	/	Negative	77	62.6	0.098	inflammation	inflammation	inflammation	vancomycin	Lumbar spine	Surgical sampling	NO	NO	NO
136	汪*	Female	76	2024.7.10	Mycobacterium tuberculosis	4	25	Negative	102	48.15	0.339	inflammation	infection	infection	vancomycin	Thoracic spine	Surgical sampling	YES	NO	NO
137	黄*	Male	57	2024.7.11	Negative	/	/	Negative	84	109.4	0.392	inflammation	infection	infection	vancomycin	Lumbar spine	Surgical sampling	YES	YES	NO
138	陈*	Male	49	2024.7.15	Negative	/	/	Negative	88	154.7	0.409	inflammation	infection	inflammation	vancomycin	Thoracic spine	Surgical sampling	NO	YES	YES
139	施*	Male	75	2024.7.3	Negative	/	/	Negative	22	4.9	0.137	inflammation	infection	infection	vancomycin	Lumbar spine	Surgical sampling	YES	NO	YES
140	高*	Female	70	2024.7.31	Staphylococcus aureus	364	92.41	Staphylococcus aureus	70	68.7	0.503	inflammation	inflammation	infection	vancomycin	Lumbar spine	Surgical sampling	NO	YES	YES
141	刘*	Female	39	2024.7.4	Negative	/	/	Negative	112	29.2	0.155	inflammation	Negative	infection	vancomycin	Thoracic spine	Surgical sampling	YES	NO	NO
142	叶*	Female	84	2024.7.4	Mycobacterium tuberculosis	19	70.37	Negative	78	8.8	0.168	inflammation	infection	Negative	vancomycin	Lumbar spine	Surgical sampling	YES	YES	NO
143	沈*	Male	59	2024.7.4	Mycobacterium tuberculosis	17324	91.36	Negative	85	133.47	0.264	inflammation	inflammation	inflammation	meropenem + vancomycin	Thoracic spine	Surgical sampling	NO	NO	NO
144	陈*	Female	60	2024.7.5	Staphylococcus aureus	1713	99.11	Staphylococcus aureus	140	99.4	0.326	inflammation	inflammation	inflammation	vancomycin	Thoracic spine	Surgical sampling	YES	YES	NO
145	张*	Male	47	2024.8.1	Escherichia coli	43	44.9	Escherichia coli	126	218.94	0.672	inflammation	inflammation	inflammation	vancomycin	Thoracic spine	Surgical sampling	YES	YES	YES
146	聂*	Male	66	2024.8.12	Negative	/	/	Negative	157	64.6	1.977	inflammation	infection	infection	vancomycin	Lumbar spine	Surgical sampling	NO	NO	NO
147	余*	Male	72	2024.8.12	Cutibacterium acnes	4316	99.2	Cutibacterium acnes	89	33.9	1.433	inflammation	inflammation	inflammation	vancomycin	Lumbar spine	Surgical sampling	YES	YES	YES
148	王*	Female	55	2024.8.21	Negative	/	/	Negative	60	38.9	<0.05	inflammation	inflammation	inflammation	vancomycin	Thoracic spine	Surgical sampling	YES	YES	NO
149	邱*	Female	44	2024.8.24	Mycobacterium tuberculosis	90403	95.93	Negative	45	85.5	<0.05	inflammation	infection	infection	vancomycin	Lumbar spine	Surgical sampling	YES	YES	NO
150	张*	Female	61	2024.8.27	Escherichia coli	5249	21.92	Escherichia coli	37	0.6	<0.05	inflammation	inflammation	inflammation	vancomycin	Lumbar spine	Surgical sampling	YES	YES	YES
151	朱*	Female	74	2024.8.7	Negative	/	/	Negative	100	178.65	1.183	inflammation	infection	infection	vancomycin	Lumbar spine	Surgical sampling	NO	YES	NO
152	陈*	Female	70	2024.8.7	Staphylococcus aureus	60	22.43	Negative	20	72.7	1.363	inflammation	infection	infection	vancomycin	Thoracic spine	Surgical sampling	YES	NO	NO
153	吴*	Female	75	2024.9.12	Escherichia coli	68	59.12	Escherichia coli	57	11.2	<0.05	inflammation	infection	infection	vancomycin	Thoracic spine	Surgical sampling	YES	YES	NO
154	连*	Female	61	2024.9.13	Negative	/	/	Negative	40	11.4	<0.05	inflammation	inflammation	inflammation	vancomycin	Thoracic spine	Surgical sampling	YES	NO	YES
155	赖*	Female	61	2024.9.15	Enterobacter aerogenes	132243	99.6	Enterobacter aerogenes	26	12.3	<0.05	inflammation	inflammation	inflammation	vancomycin	Lumbar spine	Surgical sampling	NO	NO	NO
156	张*	Female	54	2024.9.19	Prevotella spp.	177	90.31	Prevotella spp.	108	13	<0.05	inflammation	inflammation	Negative	vancomycin	Thoracic spine	Surgical sampling	YES	NO	NO
157	李*	Male	82	2024.9.25	Negative	/	/	Negative	26	23.1	<0.05	inflammation	Negative	inflammation	vancomycin	Thoracic spine	Surgical sampling	YES	NO	NO
158	林*	Female	73	2024.9.26	Negative	/	/	Negative	111	29	<0.05	inflammation	inflammation	inflammation	vancomycin + levofloxacin	Lumbar spine	Surgical sampling	YES	YES	NO
159	吴*	Male	76	2024.9.30	Mycobacterium tuberculosis	12	6.86	Staphylococcus aureus	85	48.2	<0.05	inflammation	infection	infection	vancomycin	Lumbar spine	Surgical sampling	NO	NO	NO
160	黄*	Male	73	2024.9.4	Coxiella burnetii	33	52.12	Negative	10	0.9	<0.05	inflammation	Negative	Negative	vancomycin	Lumbar spine	Surgical sampling	YES	NO	NO
161	刘*	Female	70	2024.9.4	Staphylococcus aureus	24881	90.63	Staphylococcus aureus	32	4.1	<0.05	inflammation	Negative	inflammation	vancomycin	Lumbar spine	Surgical sampling	NO	NO	NO
162	汪*	Female	66	2024.9.5	Staphylococcus aureus	136	70.14	Staphylococcus aureus	17	9.13	<0.05	inflammation	inflammation	inflammation	vancomycin	Thoracic spine	Surgical sampling	NO	NO	NO
Clearance：The names of the patients in the data have been concealed to protect patient privacy, and each patient had signed an informed consent form, as described in the Ethics statement.
