# Supplementary material for: Metagenomic next-generation sequencing for the clinical identification of spinal infection-associated pathogens
Source: Front Cell Infect Microbiol. 2025 Jan 7;14:1437665. doi: 10.3389/fcimb.2024.1437665 (PMC11753247; doi:10.3389/fcimb.2024.1437665)
Supplement: Supplementary file 2 [file Table2.xlsx]

## Sheet: 最终数据 (2)
ID	NAME	Sex	Age, yrs	Date	Results of mNGS	Sequence	Abundance(%)	Results of Culture	ESR(mm/hr)	CRP（mg/L）	PCT(ng/ml)	Histopathological	CT	MRI	Antibiotic use	Infection site	Method of sampling	Operation history	Hypertension	Diabetes
1	张*	Female	70	2021.05.25	Acinetobacter junii	234	85	Negative	37	1.5	<0.05	Negative	infection、tuberculosis	infection、tuberculosis	NO	Lumbar spine	needle biopsy	NO	NO	NO
2	徐*	Female	75	2021.12.11	Negative	/	/	Negative	55	11.85	<0.05	Negative	infection	infection	NO	Sacral vertebrae	needle biopsy	YES	NO	YES
3	吴*	Male	63	2021.12.29	Negative	/	/	Negative	40	45.8	0.15	Negative	infection	Negative	NO	Lumbar spine	needle biopsy	YES	NO	NO
4	刘*	Male	77	2022.05.02	Negative	/	/	Negative	72	69.4	<0.05	Negative	Negative	Negative	cefazolin	Lumbar spine	Surgical sampling	NO	NO	NO
5	林*	Female	70	2022.11.25	Negative	/	/	Negative	35	2.01	<0.05	Negative	inflammation	Negative	vancomycin	Lumbar spine	Surgical sampling	YES	YES	NO
6	滕*	Male	58	2023.06.01	Negative	/	/	Negative	8	1.85	0.125	Negative	infection	infection	vancomycin	Thoracic spine	Surgical sampling	YES	NO	NO
7	黄*	Male	50	2023.07.03	Negative	/	/	Negative	33	50.1	0.447	Negative	inflammation	infection	vancomycin	Lumbar spine	Surgical sampling	YES	YES	NO
8	刘*	Male	17	2023.08.22	Negative	/	/	Negative	80	19.46	<0.05	Negative	infection、tuberculosis	infection、tuberculosis	NO	Lumbar spine	needle biopsy	NO	NO	NO
9	魏*	Male	56	2023.09.07	Negative	/	/	Negative	91	15.2	0.052	Negative	infection	infection	vancomycin	Lumbar spine	Surgical sampling	YES	NO	NO
10	李*	Male	64	2023.09.18	Negative	/	/	Negative	61	100.05	0.111	Negative	infection	infection	vancomycin	Lumbar spine	Surgical sampling	NO	NO	NO
11	林*	Female	72	2023.09.28	Streptococcus agalactiae	38951	64.66	Negative	112	125.42	0.288	Negative	Negative	infection	NO	Lumbar spine	Surgical sampling	YES	NO	NO
12	赵*	Female	69	2023.12.27	Negative	/	/	Negative	36	4.4	<0.05	Negative	infection	inflammation	vancomycin	Lumbar spine	Surgical sampling	NO	NO	NO
13	谢*	Male	54	2024.01.10	Negative	/	/	Negative	33	6.44	<0.05	Negative	Negative	Negative	vancomycin	Lumbar spine	Surgical sampling	YES	NO	NO
14	林*	Male	58	2024.03.12	Negative	/	/	Staphylococcus haemolyticus	12	4.24	<0.05	Negative	Negative	Negative	NO	Lumbar spine	Surgical sampling	YES	NO	NO
15	郑*	Female	55	2024.04.17	Cutibacterium avidum	103	0.14	Negative	81	35	0.194	Negative	Negative	Negative	vancomycin	Thoracic spine	Surgical sampling	NO	NO	YES
16	吴*	Male	66	2024.04.19	Negative	/	/	Negative	7	0.4	<0.05	Negative	inflammation	inflammation	vancomycin	Lumbar spine	Surgical sampling	NO	YES	NO
17	陈*	Male	84	2024.04.30	Negative	/	/	Negative	54	35.6	0.052	Negative	infection	infection	vancomycin	Thoracic spine	Surgical sampling	YES	NO	NO
18	冯*	Male	53	2024.05.03	Negative	/	/	Negative	92	60.2	0.053	Negative	Negative	inflammation	vancomycin	Lumbar spine	Surgical sampling	YES	YES	NO
19	蔡*	Female	72	2024.05.08	Negative	/	/	Negative	17	19	0.057	Negative	inflammation	inflammation	vancomycin	Lumbar spine	Surgical sampling	NO	NO	NO
20	曾*	Female	67	2024.05.08	Negative	/	/	Negative	38	20.7	0.059	Negative	inflammation	inflammation	vancomycin	Thoracic spine	Surgical sampling	NO	YES	NO
21	郑*	Female	62	2024.05.22	Negative	/	/	Negative	59	55.13	0.072	Negative	inflammation	inflammation	vancomycin	Thoracic spine	Surgical sampling	YES	YES	YES
22	郭*	Male	71	2024.05.23	Negative	/	/	Negative	121	51.9	0.083	Negative	infection	infection	vancomycin	Lumbar spine	Surgical sampling	YES	NO	NO
23	林*	Male	77	2024.6.26	Negative	/	/	Negative	93	96.6	0.112	Negative	Negative	Negative	vancomycin	Thoracic spine	Surgical sampling	YES	YES	NO
24	蒋*	Male	66	2024.6.27	Negative	/	/	Negative	54	22.3	0.115	Negative	inflammation	inflammation	levofloxacin	Thoracic spine	Surgical sampling	YES	YES	YES
25	林*	Male	74	2024.7.3	Negative	/	/	Negative	74	78.1	0.143	Negative	inflammation	inflammation	vancomycin + levofloxacin	Lumbar spine	Surgical sampling	YES	YES	YES
26	刘*	Female	86	2024.8.12	Negative	/	/	Negative	99	127.87	1.648	Negative	inflammation	inflammation	vancomycin	Lumbar spine	Surgical sampling	YES	YES	YES
27	江*	Male	67	2024.8.19	Negative	/	/	Negative	94	49.2	38.63	Negative	inflammation	inflammation	vancomycin	Lumbar spine	Surgical sampling	YES	NO	NO
28	林*	Male	87	2024.8.29	Negative	/	/	Negative	13	0.7	<0.05	Negative	inflammation	inflammation	vancomycin	Lumbar spine	Surgical sampling	YES	NO	NO
29	吴*	Male	61	2024.8.29	Negative	/	/	Negative	7	0.71	<0.05	Negative	infection	infection	vancomycin	Lumbar spine	Surgical sampling	YES	NO	NO
30	刘*	Male	74	2024.9.4	Negative	/	/	Negative	40	7.7	<0.05	Negative	inflammation	inflammation	vancomycin + levofloxacin	Lumbar spine	Surgical sampling	NO	NO	NO
31	陈*	Female	72	2024.6.5	Negative	/	/	Negative	9	3.4	0.088	Negative	Negative	Negative	vancomycin	Thoracic spine	Surgical sampling	YES	YES	NO
Clearance：The names of the patients in the data have been concealed to protect patient privacy, and each patient had signed an informed consent form, as described in the Ethics statement.
